# Supplementary material for: Gameful Learning for a More Sustainable World
Source: Springer Nature journal article supplement (doi:10.1007/s12599-021-00731-x), 2021-12-21
Supplement: MOESM1 [file 19972270]

# **Gameful Learning for a More Sustainable World – Measuring the Effect of Design Elements on Long-Term Learning Outcomes in Correct Waste Sorting**

**Greta Hoffmann, Jella Pfeiffer**

Business & Information Systems Engineering (2021)

**Appendix (available online via <http://link.springer.com>)**

## **Experimental Procedure – Detailed**

**P1:** After closing the registration for participation in the experiment, we randomly assigned participants to one of the five experimental groups in a between-subject design. We sent instructions via email for participants to fill out the first survey and download the app (as an apk-file). The game within was locked by a server to prevent premature play and could only be accessed once the first phase officially started. In the survey, we assessed demographic information (age, gender, how long they had been living in Germany, how long they had been living in the city in which the experiment was conducted), participants' game motivation (how much they were involved in and how they felt about these games in general) and their general waste sorting motivation (how they felt about municipal waste sorting). We also included several controls checking language proficiency and conscientiousness in answering the questions. To ensure absolute anonymity in the datasets when linking the game data to the survey entries, each app showed a unique code that participants had to report in each respective survey. For this phase, we set a 48-hour timeframe followed by a pause of 24 hours that allowed for troubleshooting.

**P2:** In the second phase, we sent the next set of instructions as well as another survey link via email. We instructed the participants on the four game-based treatments to open the application and to play it through to the end and then complete the survey. In contrast, we told the control group with the non-interactive materials to attentively read through the teaching materials provided through the link for 25 minutes (this time was derived from the average playtime of the experimental version of the game during the pre-tests) and to then complete the survey. The last part of the survey was the same for all treatments: we measured the perceived usability of the application—or the materials in the case of the non-game material treatment—with the system usability scale (Brooke 1996) as well as self-stated perceived growth in competency and growth in motivation. To adapt the 30 minutes of focused attention to the survey and training, we gave participants a four-day timeframe—including a weekend—to finish the

task. We scheduled the final sessions 10-12 days after the deadline for the second phase, depending on the day of the assigned session.

**P3:** The experiment took place in a laboratory in 19 experimental sessions. Each participant was seated in a cabin where they were guided through the first part of the experiment with the final survey. We first asked participants about their perceived growth in competency and growth in motivation, and there was a final control question on any prior knowledge about the project. Next, we tested the learning outcome in three different performance measures. First, the participants completed a multiple-choice test in which they had to match all 108 trained waste items. Second, we asked all participants to take their phones and start the game application, where they had to sort all 108 items in a special version of the game. Here, each item appeared only once in one big game wave without the two additional design elements. Third, we called the participants into a separate room, where we asked them to sort a selection of real-life waste items. The design of the experimental procedure was pre-tested with seven participants.

## **Design Elaborations on the General Game**

The experiment as described in this manuscript is based on a reduced version of the serious game we built. As a complete game, it features a full set of additional game mechanics.

It can be downloaded here (Apple: <https://apps.apple.com/de/app/die-m%C3%BCll-ag/id1046221391>, Android:

<https://play.google.com/store/apps/details?id=com.bunnyandgnome.mullag>, Windows -Ger:

<https://www.microsoft.com/de-de/p/die-mull-ag/9nblggh6bvny>, Windows-Eng:

<https://www.microsoft.com/en-us/p/trash-monsters/9nblggh6bvny>). As it might be interesting to

readers to know which design decisions we made to inspire long-term interactions with the game, the following sections give further insights into some of the mechanics that were excluded from the experimental version of the game.

## **General Setting**

We designed the overall setting as a cartoon world on a waste sorting planet that serves as the main hub of the game. This world represents a metaphorical holistic view of the waste management process. The waste planet is inhabited by monsters that represent the different waste recycling processes and they all live and work together on the planet as it is their job to take care of the city planets' waste. Their homes can be visited by the player, which we designed to achieve higher emotional involvement and commitment to the topic through social interactions with the monsters. The planet overview screen connects the games' different locations. These locations are i) the waste sorting facility, where the core gameplay takes place, ii) the monsters' living spaces, where players accept quests and different minigames can be played, and iii) the info centre, where players get information on the current state of the game (pollution, sorting correctness and unlocked quests). Adjacent to the waste planet is another smaller planet that represents the respective waste supplier (in the current version, the waste system of Karlsruhe city). As each region in Germany has autonomy in its choice of waste management system, the game is designed to switch systems according to the city planet to which it is connected.

## **Story**

We designed each monster with a different type of personality that is linked to the type of waste they represent. For example, the monster representing the residual waste bin is a dragon that burns incoming residual waste. With this, we wanted to make it transparent what currently happens to objects that are thrown into the residual waste bin. We also made its personality cynical and grumpy as it understands the necessity of its job within the waste management system but at the same time hates the inevitable waste of resources that comes with its assigned job. Players can visit each monster in their home and explore their personalities through conversation. A questline is connected to each monster, resulting in the unlocking of mini quests or additional areas within the game. The questline and story progress are regulated through the game waves and new content is unlocked after each wave. Apart from the

consecutive quest structure, an additional story point is introduced in the middle of the game: the volcano starts to be active again. After a few warning earthquakes, it erupts toward the end of the game. Instead of emitting lava, it erupts into a fountain of waste that had been accumulating within the core of the planet over many years. This initiates the final waves of the game, where players have to sort double and triple amounts of waste at maximum speed to get on top of the emergency. Related to the main story, there is also an underlying mystery surrounding the planet and its history that curious and meticulous players can explore.

### **Unlockable Content (Minigames, Accessories, Mystery)**

We embedded three minigames into different locations that impart additional waste sorting information to the players. The first minigame represents the inner workings of a composting plant and is inspired by the mobile game Fruit Ninja (Halfbrick Studios pty. ltd. 2010). The second minigame represents the process of glass separation at the glass container and the third the operating principles of a battery recycling process. Every time players successfully complete a minigame, they are awarded one of nine accessories that they can present to any monster on the planet as wearables. There are also three upgrades that players can unlock to enhance the core gameplay: a lever that is unlocked in two parts and allows players to either slow down or speed up the conveyor belt, as well as a second conveyor belt that transports waste that would otherwise have fallen off the first one back across the screen. We included these items to give players the control to readjust the difficulty of the main game, to allow them to explore “the outer edges of their competency” (Gee 2003) or take away some pressure from the core gameplay. Finally, the game features a guide where players learn how to recycle paper by themselves and there is a dog that represents bulky waste management and can be trained to pick up bulky waste that occasionally blocks the main game.

### **Exclusion of Game Design Elements**

We designed the game as single player due to limitations in development resources. Thus, game incentives that build upon multiplayer interactions such as leaderboards were not included. Also, while leaderboards can be a strong incentive for certain player types, we

designed the game with a strong focus on collaboration and shared responsibility. For this, we particularly focused our efforts on the design of the relationship that players develop with the monsters. We reasoned that especially young players might be deterred from irresponsibly misorting waste items in real life if they feel an empathic connection to the monsters they encounter within the game.

Apart from the adventure mode, where the core gameplay is embedded into a narrative structure, the app also offers an endless mode of the core gameplay, where the waste items are randomly dropped and players can train and test their sorting skills outside the story mode. This mode would be suitable for the inclusion of competitive elements like leaderboards, which is planned for, if further development of the game becomes possible.

However, badges can particularly be easily perceived as a low-cost/effort playing motivator that could even lead to the opposite of the desired effect (Hamari 2017). Thus, from a design perspective, we believe that such game design elements should only be included in a game or gameful application if there is neither the time nor the budget to design a fully realized experience.

# Non-Game Materials

## Four Bins - Examples

| Residual waste                 |                                   | Recycleables                             | Biowaste*                                                                                | Paper   Cardboard                         |
|--------------------------------|-----------------------------------|------------------------------------------|------------------------------------------------------------------------------------------|-------------------------------------------|
| Ring binder, plastic           | Nylon tights                      | <b>Wood, untreated, like:</b>            | Balcony plants                                                                           | <b>Recycled paper like:</b>               |
| Ashes - packed                 | Camera lenses                     | Wooden boards, Fruit crate               | Banana peels                                                                             | Ring binder - cardboard                   |
| Baking/grease-proof paper      | Paper, very soiled or imbued      | <b>Recycleables, like:</b>               | Food waste bin liners                                                                    | Envelopes, with and without viewing panel |
| Eye glasses, broken            | Paper towels & tissues, soiled    | CDs                                      | Bread                                                                                    | Brochures                                 |
| Sanitary pads                  | Parchment Paper                   | Bucket - emptied                         | Eggshells                                                                                | Books                                     |
| Photographic slides            | Sticky plaster                    | Plastic crockery                         | Fish offal                                                                               | Egg boxes                                 |
| Floppy disks                   | Paintbrush                        | Bottles, canisters                       | Vegetable peel                                                                           | Wrapping paper, uncoated                  |
| Extractor fan filter           | Porcelain                         | Plastic film, plastic bags               | Hair                                                                                     | Notebooks                                 |
| Bicycle saddle                 | Dolls                             | Childrens toys                           | Burlap                                                                                   | Cardboard boxes                           |
| Pelts / Skins                  | Cleaning rags                     | Mixing bowl                              | Coffee grounds                                                                           | Catalogues                                |
| Binoculars                     | Eraser                            | Styrofoam (sundries in transparent bags) | Cheese residues                                                                          | Magazines                                 |
| Heat-proof glass               | Razor blades                      | <b>Metals, like:</b>                     | Bones                                                                                    | Paper - loose                             |
| Lighter, empty                 | Roller skates                     | Antenna                                  | Dead parts of plants                                                                     | Papertowels - if only slightly moist      |
| Photographic film              | Soot - packed                     | Baking Dish, metal                       | Nutshells                                                                                | Paper packaging                           |
| Felt-tip markers, dried out    | Shoes - unusable                  | Sheet metal                              | Fruit waste                                                                              | Cardboard                                 |
| Photographs                    | Napkins - used                    | Cans - emptied                           | Orange peel                                                                              | Posters                                   |
| Fountain pen, empty            | Skateboard                        | Electric cable                           | Seeds                                                                                    | Brochures                                 |
| Doormat                        | Mirror glass                      | Crown cap                                | Cut flowers                                                                              | Writing paper                             |
| Garden hose                    | Syringes, safely packed           | Brass keys                               | Left-overs, raw (no soups and sauces)                                                    | Packaging from paper, cardboard, carton   |
| Gift wrap, coated              | Vacuum cleaner bag                | Pans, pots                               | Bones                                                                                    | Advertisements - printed                  |
| Light bulbs                    | Tampons                           | Tool parts                               | Dead parts of plants                                                                     | Journals                                  |
| Rubber materials               | Wallpaper leftovers               | <b>Aluminium, like:</b>                  | Nutshells                                                                                | Newspapers                                |
| Suspenders                     | Electric torch, without batteries | Cling film                               | Fruit waste                                                                              |                                           |
| Inline skates                  | Pieces of carpet, chopped up      | Yoghurt pot lids                         | Orange peel                                                                              |                                           |
| Cassettes (audio   video)      | Thermal paper                     | Chocolate foil                           | Seeds                                                                                    |                                           |
| Chewing gum                    | Thermos flask                     | Electric cable                           | Cut flowers                                                                              |                                           |
| Sweepings                      | Animal bedding                    | Crown cap                                | Left-overs, raw (no soups and sauces)                                                    |                                           |
| Ceramics, no sanitary ceramics | Clocks - no batteries             | Brass keys                               | Tea bags                                                                                 |                                           |
| Candle stubs                   | Wound dressing                    | Pans, pots                               | Potted plants                                                                            |                                           |
| Sticky tape                    | Packaging, strongly soiled        | Tool parts                               | Rotting food, without packaging                                                          |                                           |
| Sticky labels                  | Hot-water bottle - gummi          | <b>Composite packaging like:</b>         | Sausage and processed meat leftovers                                                     |                                           |
| Carbon paper                   | Absorbent cotton                  | Blister packs                            | Lemon peel                                                                               |                                           |
| Ball pen refill                | Wicker basket                     | Milk carton - emptied                    |                                                                                          |                                           |
| Pleather                       | Diapers                           | Paper bag with synthetic padding         | <b>Biowaste that does not emerge from households has to be disposed of commercially.</b> |                                           |
| Cuddly toys                    | Cigarette ends                    | Juice cartons - emptied                  |                                                                                          |                                           |
| Leatherbags, -belts            | Ignition plugs                    | Vacuum packaging                         |                                                                                          |                                           |
| Left-over linoleum             |                                   | <b>Packaging, scraped clean, from:</b>   |                                                                                          |                                           |
| Airbed                         |                                   | Wood, plastic, metal                     |                                                                                          |                                           |
| Rags                           |                                   |                                          |                                                                                          |                                           |
| Crayons, solvent-free          |                                   |                                          |                                                                                          |                                           |
| Left-over bits of food         |                                   |                                          |                                                                                          |                                           |

Some waste types are collected via alternative waste disposal facilities like recycled glass-, used textiles-, organic waste containers, composting facilities, recycling stations, bulk waste collections as well as contaminant collection facilities.

Electrical and electronic appliances up to 50 centimeters edge length can be dropped free of charge at all recycling stations.

Large appliances can also be dropped free of charge at all recycling stations. Large electrical appliances (ovens, stoves, cooling- and freezing appliances, dryers, washing machines) will be picked up on demand. Small equipment can be placed adjacently free of charge.

Figure 1. Flyer on General Waste Sorting in Karlsruhe, translated

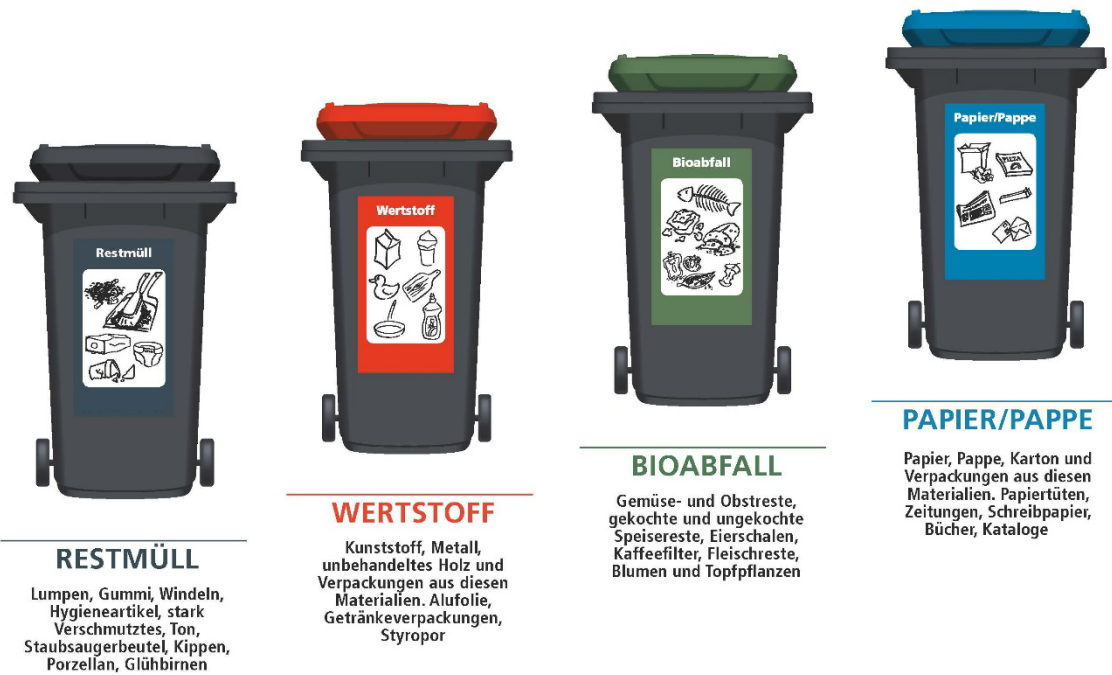

**RESTMÜLL**  
 Lumpen, Gummi, Windeln, Hygieneartikel, stark verschmutztes, Ton, Staubsaugerbeutel, Kippen, Porzellan, Glühbirnen

**WERTSTOFF**  
 Kunststoff, Metall, unbehandeltes Holz und Verpackungen aus diesen Materialien. Alufolie, Getränkeverpackungen, Styropor

**BIOABFALL**  
 Gemüse- und Obstreste, gekochte und ungekochte Speisereste, Eierschalen, Kaffeefilter, Fleischreste, Blumen und Topfpflanzen

**PAPIER/PAPPE**  
 Papier, Pappe, Karton und Verpackungen aus diesen Materialien, Papiertüten, Zeitungen, Schreibpapier, Bücher, Kataloge

Figure 3. Flyer on Bins and Representative Waste Items

**RESTMÜLL**

**WAS?**  
 Staub, Klebricht, Winceln, Asche (alle verpackt), Keramik, Porzellan, stark verschmutztes Material (wie Hygieneartikel, Glühbirnen), zerstückte Teppichreste, Tapetenreste, nicht tragfähige Kleidung und Schuhe

**WOHIN?**  
 In die Restmülltonne oder Anlieferung an der Wertstoffstation.  
 Für vollständig abfallende Spitzenmengen können Sie Ihr Handelsspezial-Abfallsäcke verwenden.

**ORGANISCHE ABFÄLLE**

**WAS?**  
**Küchenabfälle** wie Obst- und Gemüseabfälle, Teebeutel, Kaffeefilter, Eierschalen, Hefe und gekochte Speisereste, verwelkte Blumen  
**Grünabfälle** wie Laub, Rasen und Baumstümpfe, verwelkte Pflanzen

**WOHIN?**  
**Küchenabfälle** in die Bio-Tonne oder selbst kompostieren.  
**Grünabfälle** zum Grünabfallcontainer, zu den Wertstoffstationen und zu den Kompostieranlagen.

**GLAS**

**WAS?**  
**Hohlglas** wie Einwegflaschen, Mineral- und Obstgläser  
**Flachglas** Fensterglas ohne Rahmen, Aquarien- und Glasregalböden

**WOHIN?**  
**Hohlglas** getrennt nach Farben in die Altglasstationen. Achten, besser Pfandflaschen benutzen.  
**Flachglas** nur zu den Wertstoffstationen.

**WERTSTOFFE UND PAPIER**

**WAS?**  
 Metall, Kunststoff, Styropor, unbehandeltes Holz und Verpackungen aus diesen Materialien  
 Papier, Pappe, Karton und Verpackungen aus diesen Materialien

**WOHIN?**  
**Wertstofftonne** für Metall, unbehandeltes Holz und Kunststoff.  
**Papiertonne** für Papier, Pappe und Kartonen. Wertstoffe vorsortiert zu den Wertstoffstationen, Papier zur Stoffsammlung.

**SCHADSTOFFE**

**WAS?**  
 Energiesparlampen, Leuchtstoffröhren, Perle, Kleber, Lacke, Acrylnitril, Kosmetika, Netz-, Öle, Lötlot, sonstige Chemikalien, Medikamente, Pflanzen- und Schädlingsbekämpfungsmittel, dazugehörig

**WOHIN?**  
 Mobile Schadstoffsammlung oder Schadstoffannahmestellen  
**Energiesparlampen** auch zu allen Wertstoffstationen.  
 Feuerlöscher (Leeren) zurück zum Händler oder zu dem Batteriesammelbehälter im Stadtgebiet. Autoblech (Leeren) zum Händler (Pfand) oder zur Schadstoffsammlung.

**TEXTILIEN**

**WAS?**  
 Kleinststücke, die noch gut erhalten sind  
 Schulleinweisung zusammengebunden

**WOHIN?**  
 Alttextiltrommel bei einem Altglascontainer und auf den Stoffstationen oder karitative Organisationen, Tausch- und Verkaufsmarkt, Second-Hand-Läden, Flohmärkte.  
 Nicht mehr tragbares in die Restmülltonne, Teppiche zum Sperrmüll.

Figure 2. Flyer on Waste Categories



## Additional Literature Overviews

**Table 1.** Literature Comparison between Errorful (EF) and Errorless (EL) Learning

| Authors                       | Context             | Subjects                                                                                                                                                                                 | Conclusion                                           |
|-------------------------------|---------------------|------------------------------------------------------------------------------------------------------------------------------------------------------------------------------------------|------------------------------------------------------|
| Baddeley and Wilson (1994)    | Clinical            | 16 people with brain injuries and memory impairment, and 16 young and older controls each                                                                                                | EL is better than EF                                 |
| Clare et al. (1999)           | Clinical            | One participant with Alzheimer's disease                                                                                                                                                 | EL is effective and useful for memory problems       |
| Clare and Jones (2008)        | Clinical            | Six participants with early-stage DAT                                                                                                                                                    | EL is effective and useful for memory problems       |
| Donaghey et al. (2010)        | Clinical            | 30 people with an amputated limb, randomly assigned to either the experiment or control group                                                                                            | EL is better than EF                                 |
| Dunn and Clare (2007)         | Clinical            | 10 people with different conditions                                                                                                                                                      | No difference                                        |
| Evans et al. (2000)           | Clinical            | Phase 1: 18 people with brain injuries and memory impairment. Phase 2: 16 people with brain injuries and memory impairment. Phase 3: 34 people with brain injuries and memory impairment | Mixed results but overall better performance with EL |
| Hunkin et al. (1998)          | Clinical            | Eight people with memory impairment                                                                                                                                                      | EL is better than EF                                 |
| K. Ivancic and Hesketh (2000) | Driving Education   | Experiment 1: 44 people in two equal groups<br>Experiment 2: 32 people in two equal groups                                                                                               | EF is better than EL                                 |
| Johnson (2004)                | Learning Strategies | Evidence aggregation of different studies                                                                                                                                                | EF is better than EL                                 |
| Jones and Eayrs (1992)        | Teaching Strategies | Literature synopsis                                                                                                                                                                      | Inconclusive                                         |
| Kessels and Haan (2003)       | Natural Ageing      | 18 elderly and 16 young controls                                                                                                                                                         | EL is better than EF                                 |
| Kessels et al. (2007)         | Clinical            | 10 people with Korsakoff Syndrome                                                                                                                                                        | No difference                                        |
| Ohlsson (1996)                | Learning Strategies | Tests on the evaluation of own performance errors—more theoretical                                                                                                                       | Inconclusive                                         |
| Prather (1971)                | Airforce Education  | 96 people                                                                                                                                                                                | EF and EL are similarly effective                    |
| Page et al. (2006)            | Clinical            | Experiment 1: 23 people with memory impairment and 20 controls<br>Experiment 2: 20 people with memory impairment                                                                         | EL is better than EF                                 |
| Tailby and Haslam (2003)      | Clinical            | 24 people in three groups of eight each with different severity of memory impairment                                                                                                     | EL is better than EF                                 |

## Control and Additional Variables

**Table 2.** Operationalization of Control and Additional Variables

| Controls | English                              | German                                   | Tested with                                                |
|----------|--------------------------------------|------------------------------------------|------------------------------------------------------------|
| Age      | “Please tell us your age”            | „Bitte teile uns Dein Alter mit.“        | Integer value                                              |
| Gender   | “Which gender do you identify with?” | „Welchem Geschlecht ordnest Du Dich zu?“ | Male/female/other<br><i>Männlich/ Weiblich/ Sonstiges:</i> |

|                                                                  |                                                                                                              |                                                                                                              |                                                                                                                                                                                                                                   |
|------------------------------------------------------------------|--------------------------------------------------------------------------------------------------------------|--------------------------------------------------------------------------------------------------------------|-----------------------------------------------------------------------------------------------------------------------------------------------------------------------------------------------------------------------------------|
| Living in Germany                                                | How long have you been living in Germany? Please answer with number of full years.                           | „Wie lange wohnst Du schon in Deutschland? Bitte antworte in ganzen Jahren.“                                 | Integer value                                                                                                                                                                                                                     |
| Living in XX City                                                | How long have you been living in XX? Please answer with number of full years.                                | „Wie lange wohnst Du schon in XX? (Bitte antworte in ganzen Jahren)“                                         | Integer value                                                                                                                                                                                                                     |
| Game motivation (medium acceptance)                              | Please tell us about your attitude towards games.                                                            | „Bitte teile uns Deine Einstellung gegenüber Gaming mit.“                                                    | (sub-headline)                                                                                                                                                                                                                    |
|                                                                  | I play videogames (computer games, smartphone games, console games, ...) in my free time.                    | „Ich spiele in meiner Freizeit Videospiele (Computerspiele, Handygames, Konsolenspiele,...).“                | Likert (five-point):<br>Strongly disagree, rather disagree,<br>neither agree nor disagree, rather agree, strongly agree<br><i>Stimme gar nicht zu, stimme eher nicht zu, teils-teils, stimme eher zu, stimme voll und ganz zu</i> |
|                                                                  | I am prejudiced towards grown-ups who play videogames. (r)                                                   | „Ich habe Vorurteile gegenüber erwachsenen Menschen, die Videospiele spielen.“(r)                            |                                                                                                                                                                                                                                   |
|                                                                  | I wish videogames were more accepted in society.                                                             | „Ich wünschte, Videospiele würden eine höhere Akzeptanz in der Gesellschaft genießen.“                       |                                                                                                                                                                                                                                   |
|                                                                  | I think videogames are a waste of time. (r)                                                                  | „Ich denke, dass Videospiele eine Form der Zeitverschwendung sind.“(r)                                       |                                                                                                                                                                                                                                   |
|                                                                  | Videogames are my hobby.                                                                                     | „Videospiele sind mein Hobby.“                                                                               |                                                                                                                                                                                                                                   |
|                                                                  | I feel that too much attention is spent on videogames. (r)                                                   | „Ich finde, dass man Videospiele zu viel Aufmerksamkeit schenkt.“(r)                                         |                                                                                                                                                                                                                                   |
| General waste sorting motivation (general interest in the topic) | What is your attitude towards waste sorting at home? Please answer honestly.                                 | „Wie ist Deine Einstellung zu Mülltrennung? Bitte antworte ehrlich.“                                         | Likert (five-point)<br>Fully applicable, rather applicable, partly applicable, rather not applicable, not applicable<br><i>trifft voll zu, trifft eher zu, teils-teils, trifft eher nicht zu, trifft nicht zu</i>                 |
|                                                                  | I have never given any thought to waste sorting.                                                             | „Ich habe mir noch nie über Mülltrennung Gedanken gemacht.“                                                  |                                                                                                                                                                                                                                   |
|                                                                  | Waste sorting at home is very important to me.                                                               | „Mir ist Mülltrennung im Haushalt sehr wichtig.“                                                             |                                                                                                                                                                                                                                   |
| Waste sorting motivation and competency                          | Please let us know to what extent you agree with the following statements.                                   | „Bitte teile uns mit, inwiefern Du den folgenden Aussagen zustimmst“                                         | Likert (five-point)<br>Strongly disagree, rather disagree, neither agree nor disagree, rather agree, strongly agree<br><i>Stimme gar nicht zu, stimme eher nicht zu, teils-teils, stimme eher zu, stimme voll und ganz zu</i>     |
| Waste sorting motivation: last two weeks                         | Since part 2 of the experiment, have you been more motivated to correctly sort your waste?                   | Warst Du seit Teil 2 des Experimentes motivierter, Deinen Müll korrekt zu trennen?                           |                                                                                                                                                                                                                                   |
| Waste sorting motivation: from now on                            | Since part 2 of the experiment, have you felt more skilled at correctly sort your waste?                     | Hast Du Dich seit Teil 2 des Experimentes kompetenter darin gefühlt, Deinen Müll richtig zu trennen?         |                                                                                                                                                                                                                                   |
| Waste sorting competency: last two weeks                         | After participating in this experiment, do you feel more motivated to correctly sort your waste from now on? | Bist Du nach Abschluss dieses Experiments motivierter, ab jetzt Deinen Müll korrekt zu trennen?              |                                                                                                                                                                                                                                   |
| Waste sorting competency: from now on                            | After participating in this experiment, do you feel more skilled at correctly sort your waste from now on?   | Fühlst Du Dich nach Abschluss dieses Experiments kompetenter darin, Deinen Müll ab jetzt richtig zu trennen? |                                                                                                                                                                                                                                   |
| SUS                                                              | See Brooke (1996).                                                                                           | See Brooke (1996)                                                                                            |                                                                                                                                                                                                                                   |

(r) refers to the questions being reverse-coded

**Table 3.** Control Variables - Descriptive Statistics

|                                  | Mean  | Std. Dev. | Min  | Max | Scale/Type of Measure                                                                                                         |
|----------------------------------|-------|-----------|------|-----|-------------------------------------------------------------------------------------------------------------------------------|
| Age                              | 22.72 | 3.01      | 17   | 41  | Age in years (integer values)                                                                                                 |
| Living in Germany                | 20.73 | 5.90      | 0    | 30  | Number of years (integer values)                                                                                              |
| Living in XX City                | 4.28  | 5.46      | 0    | 28  | Number of years (integer values)                                                                                              |
| Gaming motivation                | 3.12  | .90       | 1.17 | 5   | Likert five-point (six items, three reverse-coded)                                                                            |
| General waste sorting motivation | 4.23  | .80       | 1.5  | 5   | Likert five-point (two items)                                                                                                 |
| SUS                              | 78.79 | 12.93     | 30   | 100 | SUS score: map answers (Likert five-point) from 0 (lowest) to 4 (highest), add the values of all 10 items and multiply by 2.5 |

**Table 4.** Control Variables – Descriptive Statistics per Treatment

|                                  | Non-game material                   |           | Repeat element  |           | Look-up element |           | Combined         |           | Core gameplay    |           |
|----------------------------------|-------------------------------------|-----------|-----------------|-----------|-----------------|-----------|------------------|-----------|------------------|-----------|
|                                  | mean (min/max) / percent for gender | std. dev. | mean (min/max)  | std. dev. | mean (min/max)  | std. dev. | mean (min/max)   | std. dev. | mean (min/max)   | std. dev. |
| Age                              | 23.28 (19/30)                       | 3.28      | 22.6 (18/41)    | 3.76      | 22.42 (17/28)   | 2.46      | 23.34 (18/32)    | 2.83      | 22.09 (19/30)    | 2.47      |
| Gender (male)                    | 71.8%                               |           | 65.2%           |           | 75.6%           |           | 63.4%            |           | 54.5%            |           |
| Gender (female)                  | 28.2%                               |           | 32.6%           |           | 24.4%           |           | 36.6%            |           | 45.4%            |           |
| Gender (diverse)                 |                                     |           | 2.2%            |           |                 |           |                  |           |                  |           |
| Living in Germany                | 21.85 (3/30)                        | 5.46      | 20.22 (2/28)    | 5.33      | 21.13 (1/28)    | 5.48      | 21.34 (3/28)     | 5.64      | 19.30 (0/30)     | 7.27      |
| Living in XX City                | 4.08 (0/28)                         | 5.60      | 4.82 (0/23)     | 6.13      | 3.77 (0/22)     | 4.00      | 4.46 (0/27)      | 5.74      | 4.26 (0/27)      | 5.77      |
| Gaming motivation                | 3.25 (1.17/5)                       | 1.05      | 3.04 (1.17/5)   | .89       | 3.21 (2/4.83)   | .80       | 3.03 (1.33/4.67) | .88       | 3.07 (1.17/4.67) | .88       |
| General waste sorting motivation | 4.13 (1.5/5)                        | .92       | 4.23 (2/5)      | .74       | 4.13 (2/5)      | .84       | 4.44 (2.5/5)     | .64       | 4.23 (2/5)       | .84       |
| SUS                              | 76.73 (32.5/95)                     | 14.13     | 78.91 (47.5/95) | 11.91     | 75.44 (45/97.5) | 13.86     | 81.59 (42.5/100) | 10.81     | 81.31 (30/100)   | 13.13     |

## Additional Analyses

**Table 5.** Effect of the Game in Comparison with the Non-Game Material Group with Control Variables

|                                              | In-Game Performance                          |                | Multiple-Choice Test                         |                | Real-Life Sorting                            |                |
|----------------------------------------------|----------------------------------------------|----------------|----------------------------------------------|----------------|----------------------------------------------|----------------|
| <b>Reference category: Non-game material</b> | coef. (bootstr. std. error) [conf. interval] | p (two-tailed) | coef. (bootstr. std. error) [conf. interval] | p (two-tailed) | coef. (bootstr. std. error) [conf. interval] | p (two-tailed) |

|                                  |                               |        |                               |        |                               |        |
|----------------------------------|-------------------------------|--------|-------------------------------|--------|-------------------------------|--------|
| Game (all 4 game treatments)     | .045 (.016)<br>[.019, .072]   | .005** | .090 (.019)<br>[.058, .121]   | .000** | .068 (.031)<br>[.018, .119]   | .025*  |
| <b>Control Variables</b>         |                               |        |                               |        |                               |        |
| Age                              | .000 (.003)<br>[-.005, .005]  | .961   | -.001 (.003)<br>[-.007, .005] | .714   | -.007 (.004)<br>[-.015, .000] | .060   |
| Gender                           | -.020 (.014)<br>[-.048, .007] | .145   | -.017 (.016)<br>[-.049, .015] | .306   | -.049 (.027)<br>[-.102, .005] | .073   |
| Living in Germany                | .005 (.001)<br>[.002, .007]   | .000** | .005 (.002)<br>[.002, .008]   | .002*  | .003 (.003)<br>[-.002, .009]  | .229   |
| Living in XX City                | .001 (.001)<br>[-.001, .003]  | .341   | .002 (.001)<br>[-.001, .004]  | .170   | .002 (.002)<br>[-.002, .005]  | .406   |
| Gaming motivation                | .009 (.007)<br>[-.005, .023]  | .210   | .009 (.008)<br>[-.007, .025]  | .290   | .010 (.013)<br>[-.016, .036]  | .446   |
| General waste sorting motivation | .020 (.008)<br>[.004, .035]   | .012*  | .016 (.009)<br>[-.002, .033]  | .085   | .027 (.016)<br>[-.005, .059]  | .100   |
| SUS                              | .001 (.000)<br>[-.001, .002]  | .064   | .001 (.001)<br>[-.000, .002]  | .262   | .001 (.001)<br>[-.001, .003]  | .181   |
| Constant                         | .426 (.066)<br>[.318, .534]   | .000** | .361 (.079)<br>[.231, .492]   | .000** | .570 (.108)<br>[.392, .748]   | .000** |
| N                                |                               | 213    |                               | 213    |                               | 213    |
| R <sup>2</sup>                   |                               | .193   |                               | .212   |                               | .091   |
| Adj. R <sup>2</sup>              |                               | .161   |                               | .181   |                               | .055   |

For the treatment groups, we used an alpha-error level of 10% (\*p<0.1, \*\*p<0.01).

For the other controls that did not have directed hypotheses, we set the alpha-error level to 5% (\*p<0.05, \*\*p<0.01).

Male was coded as 0, female as 1 and diverse as 2.

**Table 6.** Effects of the Design Elements in Comparison with the Non-Game Material Group with Control Variables

| Reference category:<br>Non-game material | In-Game Performance                                |                | Multiple-Choice Test                               |                | Real-Life Sorting                                  |                |
|------------------------------------------|----------------------------------------------------|----------------|----------------------------------------------------|----------------|----------------------------------------------------|----------------|
|                                          | coef.<br>(bootstr. std. error)<br>[conf. interval] | p (two-tailed) | coef.<br>(bootstr. std. error)<br>[conf. interval] | p (two-tailed) | coef.<br>(bootstr. std. error)<br>[conf. interval] | p (two-tailed) |
| Repeat element                           | .033 (.020)<br>[.001, .066]                        | .094*          | .086 (.023)<br>[.048, .124]                        | .000**         | .073 (.038)<br>[.010, .135]                        | .056*          |
| Look-up element                          | .044 (.021)<br>[.009, .078]                        | .037*          | .090 (.023)<br>[.052, .127]                        | .000**         | .072 (.037)<br>[.012, .132]                        | .050*          |
| Combined                                 | .076 (.019)<br>[.044, .107]                        | .000**         | .117 (.023)<br>[.079, .154]                        | .000**         | .056 (.040)<br>[-.010, .123]                       | .163           |
| Core gameplay                            | .029 (.020)<br>[-.004, .062]                       | .144           | .065 (.023)<br>[.027, .104]                        | .005**         | .071 (.035)<br>[.013, .129]                        | .045*          |
| <b>Control Variables</b>                 |                                                    |                |                                                    |                |                                                    |                |
| Age                                      | -.000 (.002)<br>[-.005, .004]                      | .841           | -.002 (.003)<br>[-.007, .004]                      | .542           | -.007 (.004)<br>[-.015, .001]                      | .074           |
| Gender                                   | -.019 (.014)<br>[-.046, .008]                      | .175           | -.014 (.016)<br>[-.046, .018]                      | .389           | -.049 (.028)<br>[-.103, .005]                      | .078           |
| Living in Germany                        | .004 (.001)<br>[.002, .007]                        | .000**         | .005 (.002)<br>[.002, .008]                        | .002**         | .003 (.003)<br>[-.002, .009]                       | .239           |
| Living in XX City                        | .001 (.001)<br>[-.001, .003]                       | .265           | .002 (.001)<br>[-.001, .004]                       | .140           | .002 (.002)<br>[-.002, .005]                       | .433           |
| Gaming motivation                        | .009 (.007)<br>[-.005, .023]                       | .195           | .009 (.008)<br>[-.007, .026]                       | .267           | .010 (.013)<br>[-.016, .036]                       | .461           |

|                                  |                              |        |                              |        |                              |        |
|----------------------------------|------------------------------|--------|------------------------------|--------|------------------------------|--------|
| General waste sorting motivation | .018 (.008)<br>[.003, .033]  | .019*  | .014 (.009)<br>[-.003, .032] | .114   | .028 (.017)<br>[-.005, .060] | .095   |
| SUS                              | .001 (.000)<br>[-.000, .002] | .064   | .001 (.001)<br>[-.000, .002] | .255   | .001 (.001)<br>[-.001, .003] | .170   |
| Constant                         | .449 (.067)<br>[.318, .580]  | .000** | .382 (.079)<br>[.228, .536]  | .000** | .561 (.108)<br>[.347, .774]  | .000** |
| N                                |                              | 213    |                              | 213    |                              | 213    |
| R <sup>2</sup>                   |                              | .219   |                              | .233   |                              | .092   |
| Adj. R <sup>2</sup>              |                              | .176   |                              | .191   |                              | .042   |

For the treatment groups, we used an alpha-error level of 10% (\*p<0.1, \*\* p<0.01).

For the other controls that did not have directed hypotheses, we set the alpha-error level to 5% (\* p<0.05, \*\* p<0.01).

**Table 7.** Effects of the Design Elements in Comparison with the Core Gameplay

| Reference category:<br>Core gameplay | In-Game Performance                                |                | Multiple-Choice Test                               |                | Real-Life Sorting                                  |                |
|--------------------------------------|----------------------------------------------------|----------------|----------------------------------------------------|----------------|----------------------------------------------------|----------------|
|                                      | coef.<br>(bootstr. std. error)<br>[conf. interval] | p (two-tailed) | coef.<br>(bootstr. std. error)<br>[conf. interval] | p (two-tailed) | coef.<br>(bootstr. std. error)<br>[conf. interval] | p (two-tailed) |
| Repeat element                       | .004 (.019)<br>[-.027, .035]                       | .831           | .021 (.022)<br>[-.015, .056]                       | .337           | .002 (.033)<br>[-.052, .056]                       | .958           |
| Look-up element                      | .015 (.021)<br>[-.019, .049]                       | .470           | .024 (.021)<br>[-.011, .059]                       | .256           | .001 (.033)<br>[-.023, .055]                       | .978           |
| Combined                             | .047 (.019)<br>[.016, .077]                        | .012*          | .052 (.022)<br>[.017, .086]                        | .015*          | -.015 (.036)<br>[-.073, .044]                      | .681           |
| Non-game material                    | -.029 (.020)<br>[-.062, .004]                      | .144           | -.065 (.023)<br>[-.104, -.027]                     | .005*          | -.071 (.035)<br>[-.129, -.013]                     | .045*          |
| <b>Control Variables</b>             |                                                    |                |                                                    |                |                                                    |                |
| Age                                  | -.000 (.002)<br>[-.005, .004]                      | .841           | -.002 (.003)<br>[-.007, .004]                      | .542           | -.007 (.004)<br>[-.015, .001]                      | .074           |
| Gender                               | -.019 (.014)<br>[-.046, .008]                      | .175           | -.014 (.016)<br>[-.046, .018]                      | .389           | -.049 (.028)<br>[-.103, .005]                      | .078           |
| Living in Germany                    | .004 (.001)<br>[.002, .007]                        | .000**         | .005 (.002)<br>[.002, .008]                        | .002**         | .003 (.003)<br>[.002, .009]                        | .239           |
| Living in XX City                    | .001 (.001)<br>[-.001, .003]                       | .265           | .002 (.001)<br>[-.001, .004]                       | .140           | .002 (.002)<br>[-.002, .005]                       | .433           |
| Gaming motivation                    | .009 (.007)<br>[-.005, .023]                       | .195           | .009 (.008)<br>[-.007, .026]                       | .267           | .010 (.013)<br>[-.016, .036]                       | .461           |
| General waste sorting motivation     | .018 (.008)<br>[.003, .033]                        | .019*          | .014 (.009)<br>[-.003, .032]                       | .114           | .028 (.017)<br>[-.005, .060]                       | .095           |
| SUS                                  | .001 (.000)<br>[.000, .002]                        | .064           | .001 (.001)<br>[-.000, .002]                       | .255           | .001 (.001)<br>[-.001, .003]                       | .170           |
| Constant                             | .478 (.065)<br>[.350, .606]                        | .000**         | .447 (.078)<br>[.294, .601]                        | .000**         | .632 (.107)<br>[.421, .842]                        | .000**         |
| N                                    |                                                    | 213            |                                                    | 213            |                                                    | 213            |
| R <sup>2</sup>                       |                                                    | .219           |                                                    | .233           |                                                    | .092           |
| Adj. R <sup>2</sup>                  |                                                    | .176           |                                                    | .191           |                                                    | .042           |

For the treatment groups, we used an alpha-error level of 10% (\*p<0.1, \*\* p<0.01).

For the other controls that did not have directed hypotheses, we set the alpha-error level to 5% (\* p<0.05, \*\* p<0.01).
